# Supplementary material for: Halide-sulfide bilayer electrolytes for LiFePO4-based all-solid-state batteries
Source: Royal Society of Chemistry journal article supplement (doi:10.1039/d4gc01640h), 2024-01-01
Supplement: d4gc01640h1.pdf [file d4gc01640h1.pdf]

## Support Information

### Halide-sulfide bilayer electrolytes for LiFePO<sub>4</sub>-based all-solid-state batteries

Guoyao Zhang <sup>a</sup>, Xixi Shi <sup>a</sup>, Qili Su <sup>b</sup>, Yiming Sun <sup>c</sup>, Yong Lu <sup>b</sup>, Kai Liu <sup>a\*</sup>, Zhe Li <sup>b\*</sup>,  
Haijing Liu <sup>b\*</sup>, Lianqi Zhang <sup>a\*</sup>

<sup>a</sup> School of Materials Science and Engineering, Tianjin University of Technology, Tianjin 300384, China

<sup>b</sup> China Science Lab, General Motors Global Research & Development, Shanghai 201206, China

<sup>c</sup> School of Materials Science and Engineering, Tianjin University, Tianjin 300350, China

\* Corresponding author. E-mail: [liukai\\_tju\\_edu\\_cn@163.com](mailto:liukai_tju_edu_cn@163.com) (K. Liu), [zhe.4.li@gm.com](mailto:zhe.4.li@gm.com) (Z. Li),  
[helen.liu@gm.com](mailto:helen.liu@gm.com) (H. Liu), [tianjinzhanglq@163.com](mailto:tianjinzhanglq@163.com) (L. Zhang)

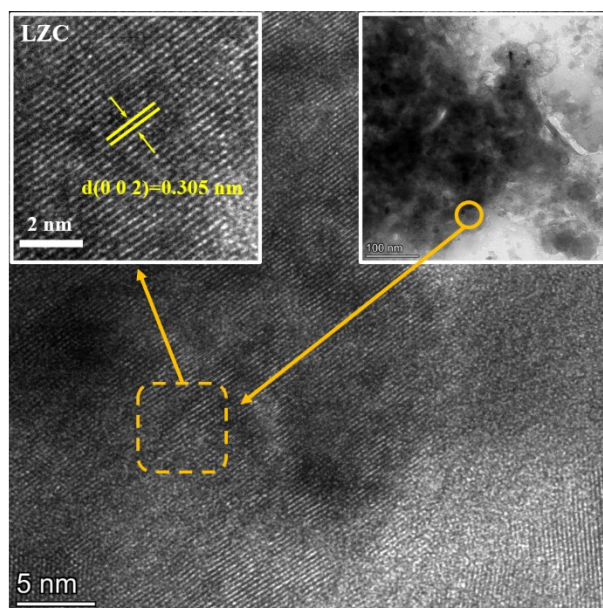

**Fig. S1.** HRTEM plots of LZC

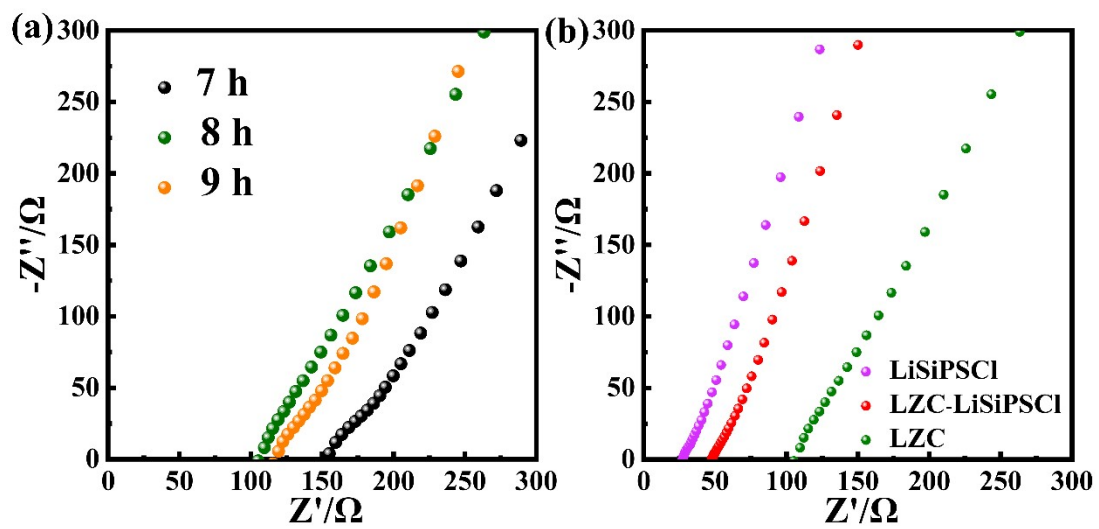

**Fig. S2.** Nyquist plots of (a) LZC after different ball milling times, (b) LiSiPSCl and LZC-LiSiPSCl at room temperature.

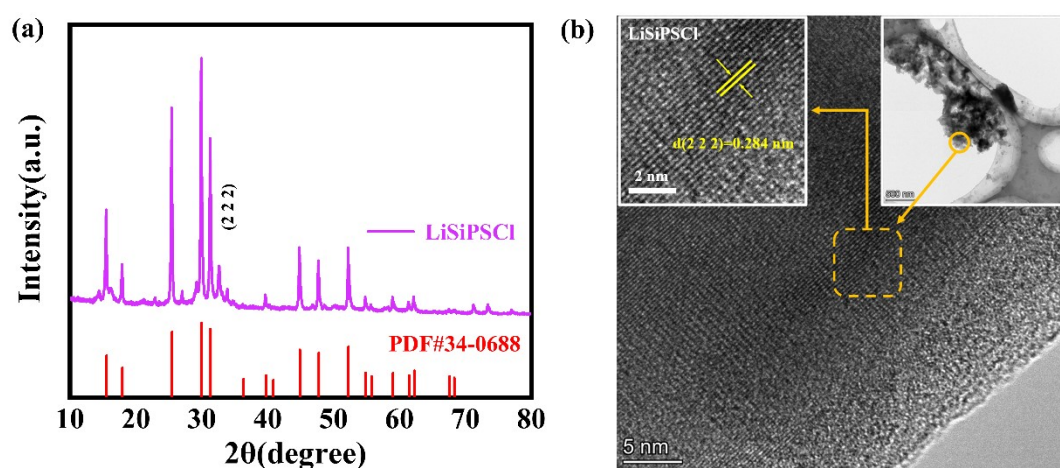

**Fig. S3.** (a) XRD and (b) HRTEM plots of LiSiPSCl

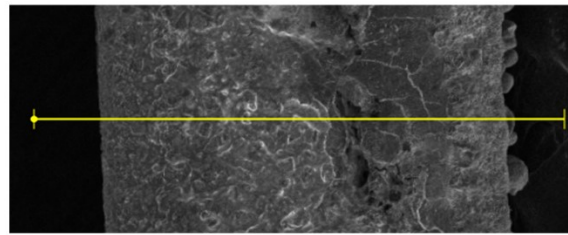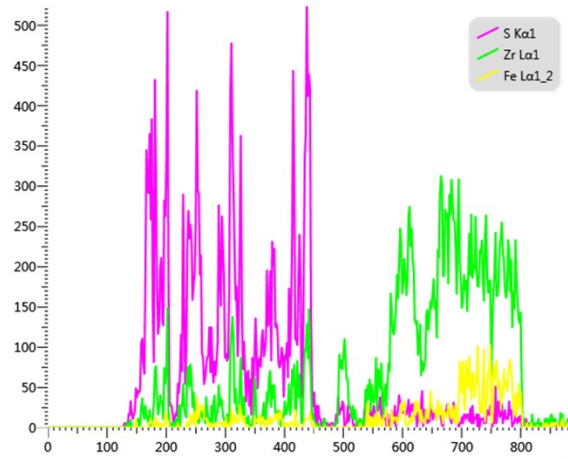

**Fig. S4.** Cross-sectional line scan of LFP-LZC/LZC/LiSiPSCl/Li-In ASSBs.

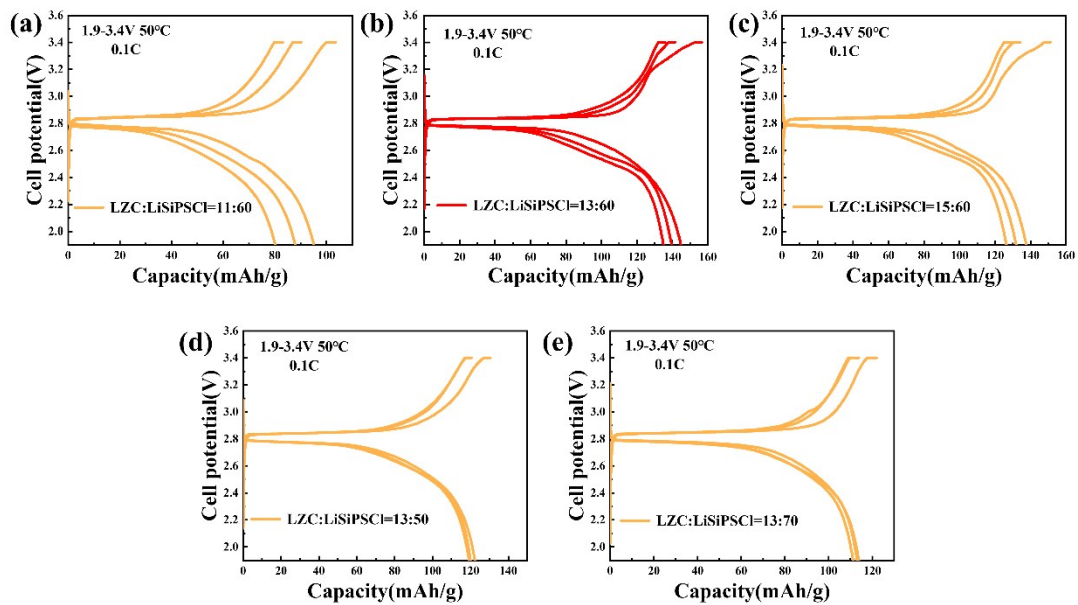

**Fig. S5.** Electrochemical performance of all-solid-state batteries assembled with different ratios of LZC solid-state electrolytes and LiSiPSCl solid-state electrolytes

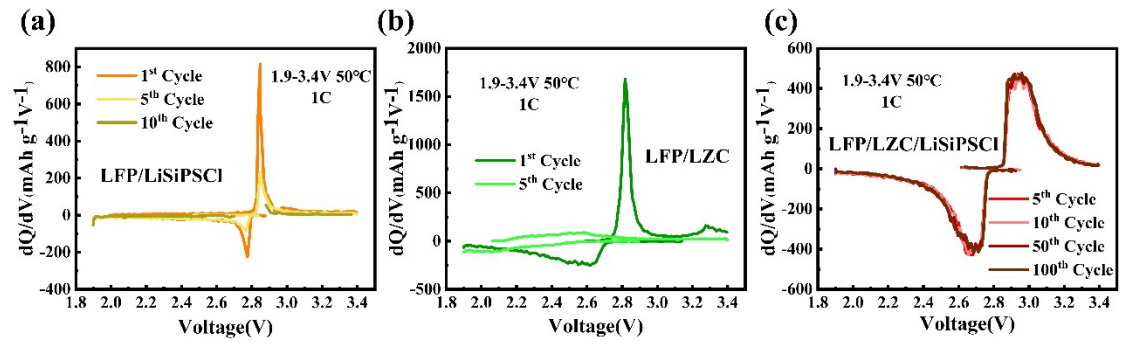

**Fig. S6.**  $dQ/dV$  curves for different number of cycles for (a) LiSiPSCl, (b) LZC and (c) LZC-LiSiPSCl cells.

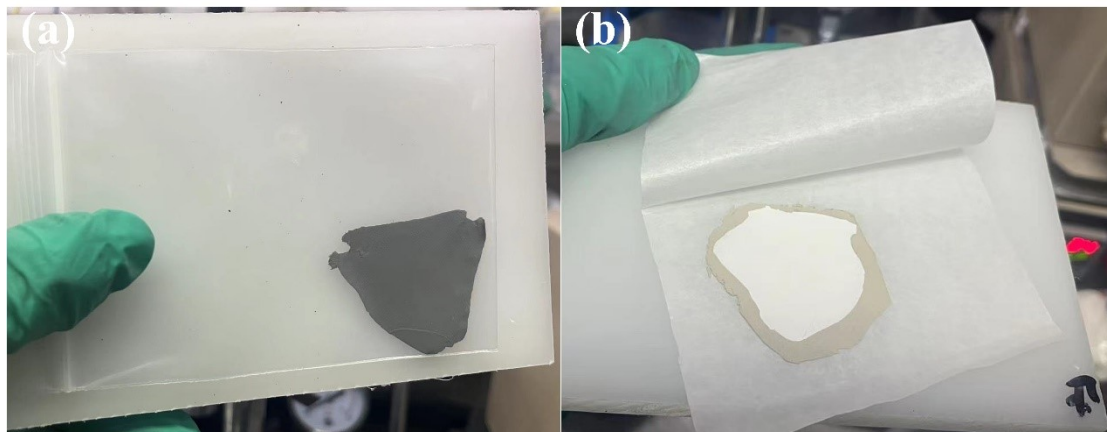

**Fig. S7.** (a) LFP composite positive electrode and (b) LZC-LiSiPSCl bilayer electrolyte prepared as lamellar membrane.



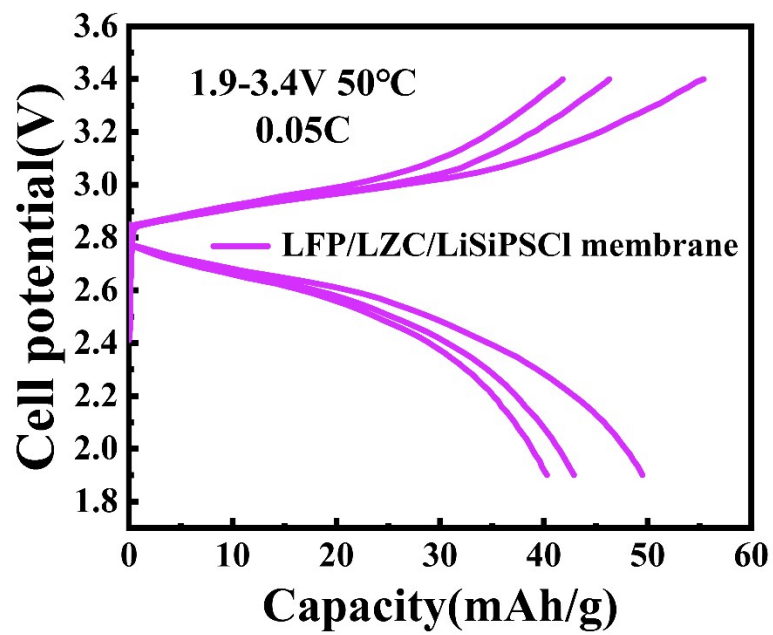

Fig. S8. Electrochemical performance of LFP all-solid-state membrane batteries.

**Table. S1.** Fitting data for LiSiPSCl, LZC and LZC-LiSiPSCl cycle EIS and error values.

| Composite        | Cycle             | Resistance ( $\Omega$ ) |     |      | $\delta$ (%) |
|------------------|-------------------|-------------------------|-----|------|--------------|
|                  |                   | SSE/Bulk                | SEI | CT   |              |
| LFP/LiSiPSCl     | 1 <sup>st</sup>   | 12                      | 47  | 278  | 0.136        |
|                  | 100 <sup>st</sup> | 20                      | 212 | 3800 | 0.203        |
| LFP/LZC          | 1 <sup>st</sup>   | 69                      | 21  | \    | 0.145        |
|                  | 100 <sup>st</sup> | 140                     | 493 | \    | 0.167        |
| LFP/LZC/LiSiPSCl | 1 <sup>st</sup>   | 29                      | 9   | \    | 0.138        |
|                  | 100 <sup>st</sup> | 28                      | 33  | \    | 0.120        |
